# Supplementary material for: Silver-incorporated NiCo metal–organic frameworks with controlled morphology for enhanced cycling in flexible supercapacitor applications
Source: Royal Society of Chemistry journal article supplement (doi:10.1039/d4tc02970d), 2024-10-31
Supplement: d4tc02970d1.pdf [file d4tc02970d1.pdf]

1 **Supporting Information**

2

3 **Silver-incorporated NiCo metal-organic frameworks with controlled morphology**  
4 **for enhanced cycling in flexible supercapacitors application**

5

6 Chu Chu<sup>a</sup>, Wenjing Zhang<sup>a,c</sup>, Xuehua Yan<sup>a,b,\*</sup>, Yingnan Yan<sup>a</sup>, Jianmei Pan<sup>a</sup>, Zohreh

7 Shahnnavaz<sup>b</sup>, Jamile Mohammadi Moradian<sup>b</sup>

8

9 *<sup>a</sup>School of Materials Science and Engineering, Jiangsu University, Zhenjiang 212013, China*

10 *<sup>b</sup>Institute for Advanced Materials, Jiangsu University, Zhenjiang 212013, China*

11 *<sup>c</sup>School of Materials Science and Engineering, Tongji University, Shanghai 200082, China*

12

13 \*Corresponding author: Xuehua Yan; E-mail address: [xhyan@ujs.edu.cn](mailto:xhyan@ujs.edu.cn) (X.H Yan)

#### 14 **Analytical techniques**

15 X-ray diffraction (XRD, D8 ADVANCE) analysis was employed to determine the  
16 crystal structures of the prepared materials with a scanning range of  $5^{\circ}$ - $90^{\circ}$  and  $5^{\circ}$ - $30^{\circ}$   
17 angles. A Raman spectrometer (DXR) was used to qualitatively analyze the prepared  
18 materials. The elemental compositions and atomic valence states of the composites  
19 were investigated using X-ray photoelectron spectroscopy (XPS, Thermo ESCALAB  
20 250Xi). The morphology of the product was examined by field-emission scanning  
21 electron microscopy (SEM, JEOL JSM-7800F).  $N_2$  adsorption-desorption isotherms  
22 were measured using a Micromeritics 3Flex instrument, and the sample was degassed  
23 for 6 h at  $120^{\circ}C$ . ICP-OES data were obtained using Thermo Fisher iCAP PRO. The  
24 HRTEM analysis was conducted using a Thermo Fisher TF-20 instrument, which  
25 allowed for the evaluation of element distribution and interplanar spacing within the  
26 materials. The Brunauer-Emmett-Teller (BET) surface area analysis, along with  
27 nitrogen ( $N_2$ ) adsorption and desorption isotherms recorded at 77 K, was performed  
28 utilizing the NOVA 3000e surface area and pore size analyzer from Quantachrome  
29 Instruments, Florida. Before analysis, the samples were degassed under vacuum  
30 conditions at  $150^{\circ}C$  for a duration of 3 h. To determine the pore size distribution and  
31 total pore volume of the samples, the Barrett-Joyner-Halenda (BJH) method was  
32 employed.

#### 33 **Electrochemical measurements**

34 According to the GCD diagram, the specific capacitance can be calculated using the

35 equation S1 and is expressed as follows:

$$36 \quad C_s = \frac{I\Delta t}{m\Delta V} \quad (S1)$$

37 where  $I$  is the discharge current,  $\Delta t$  is the discharge time,  $m$  is the mass of the prepared  
38 electrode, and  $\Delta V$  is the voltage window of the test system.

39 Moreover, the coulombic efficiency  $\eta$  of the capacitor cell can be calculated from the  
40 GCD experiments using equation S2, which is expressed as

$$41 \quad \eta = \frac{\Delta t_D}{\Delta t_C} \quad (S2)$$

42 where  $\Delta t_D$  and  $\Delta t_C$  are the number of discharge and charge cycles, respectively.

43 The total voltammetric charge ( $q_T^*$ ), along with the outer voltammetric charge ( $q_O^*$ )  
44 and inner voltammetric charge ( $q_I^*$ ), were determined using equations (S4), (S5) and  
45 (S6) [1].

$$46 \quad (q^*)^{-1} = (q_T^*)^{-1} + kv^{1/2} \quad (S3)$$

$$47 \quad q^* = q_O^* + k'v^{-1/2} \quad (S4)$$

$$48 \quad q_T^* = q_O^* + q_I^* \quad (S5)$$

49 The surface capacitance and diffusion contributions to the total charge storage can be  
50 calculated using the following equation:

$$51 \quad i(V) = k_1v + k_2v^{1/2} \quad (S6)$$

52 where  $i(V)$  signifies the current output at potential  $V$ ,  $v$  denotes the scan rate, and  $k_1v$   
53 and  $k_2v^{1/2}$  are constants that correspond to capacitor control resulting from surface  
54 charge adsorption and diffusion control stemming from the redox reaction, respectively.

55 **Electrochemical analysis of the flexible quasi-solid state symmetric SCs**

56 The energy density (Wh/kg) and power density (W/kg) could be calculated by  
57 equation(s) S7 and S8:

$$58 \quad E = \frac{C\Delta V^2}{7.2} \quad (S7)$$

$$59 \quad P = \frac{E \times 3600}{\Delta t} \quad (S8)$$

60 where  $C$ ,  $\Delta V$ , and  $\Delta t$  are the specific capacitance (F/g), working potential (V), and  
61 discharge period (s), respectively, of the device.

62

63

64

65

66

67

68

69

70

71

72

73

74

75

76

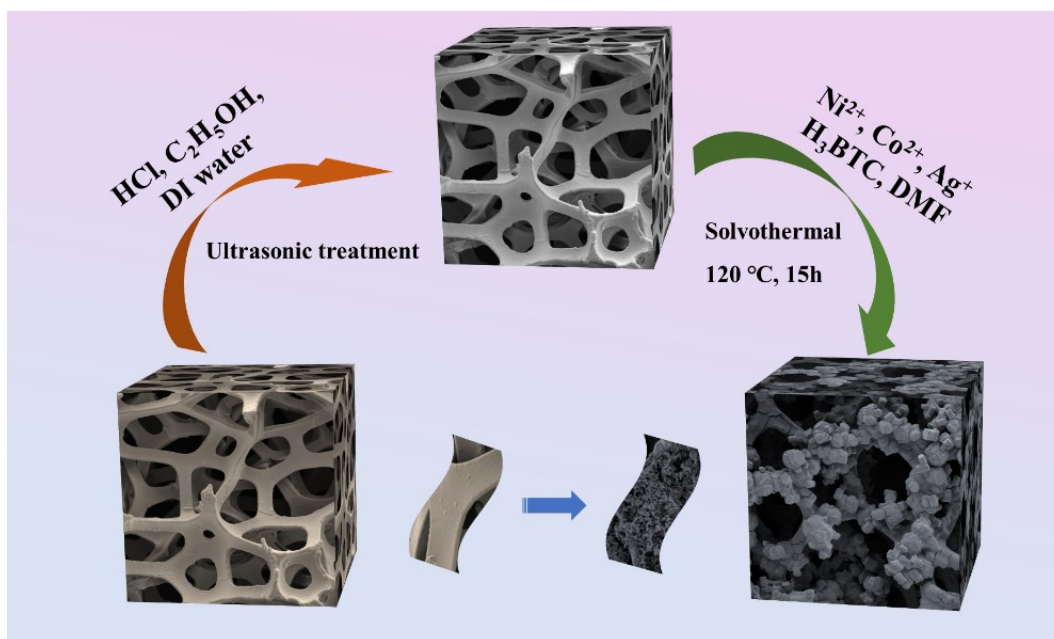

77

78 **Figure S1** Schematic representation of Ag-incorporated flexible NiCo-MOF/NF electrode

79

materials synthesis.

80

81

82

83

84

85

86

87

88

89

90

91

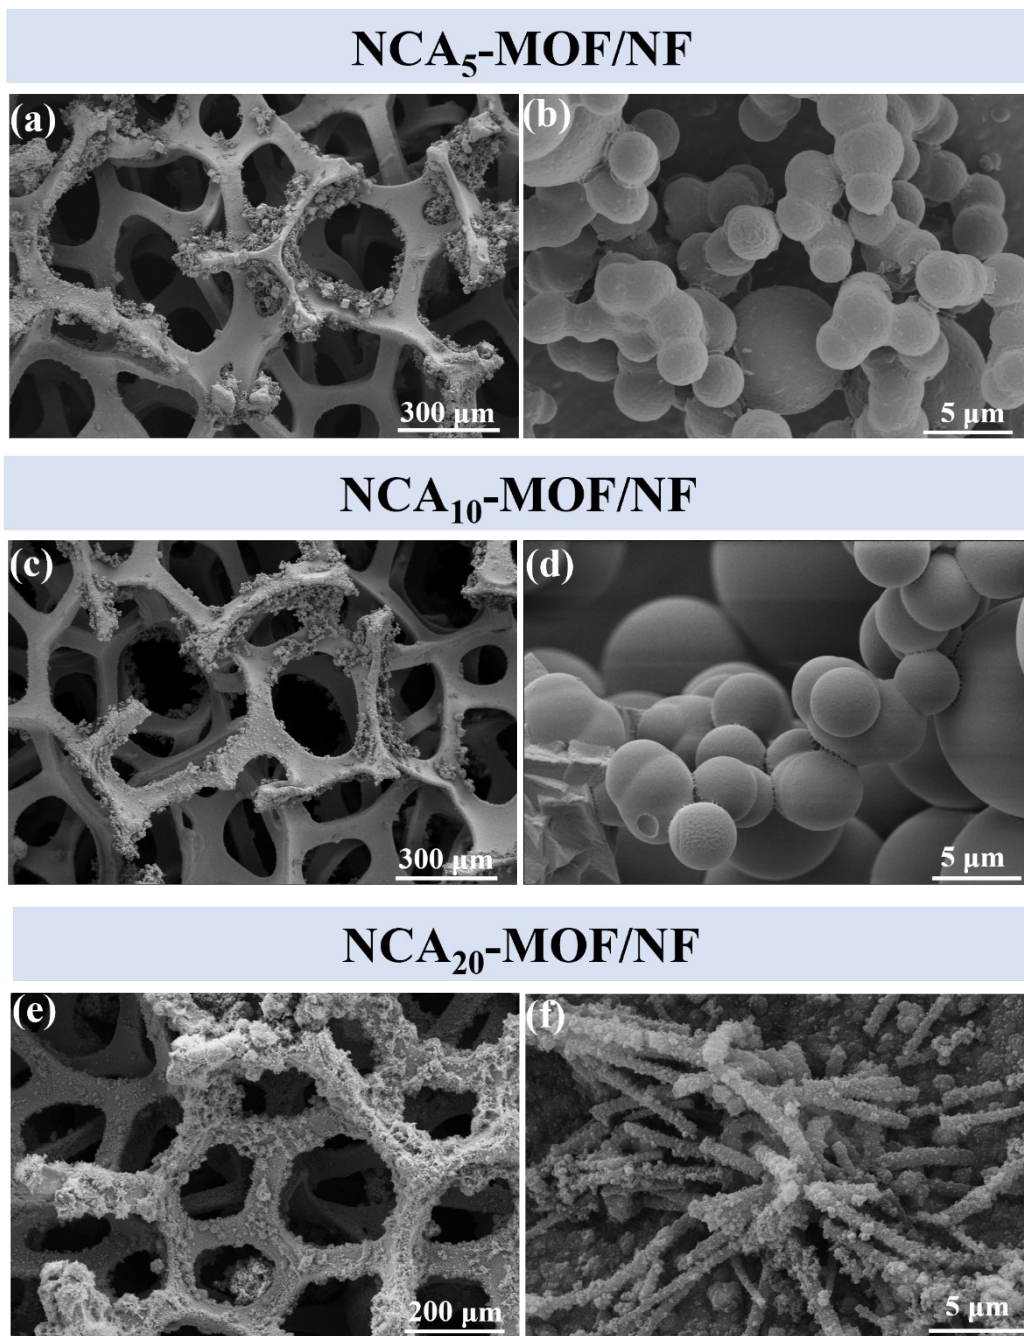

92

93 **Figure S2** SEM images of **(a, b)** NCA<sub>5</sub>-MOF/NF, **(c, d)** NCA<sub>10</sub>-MOF/NF, and **(e, f)** NCA<sub>20</sub>-

94

MOF/NF electrodes.

95

96

97

98

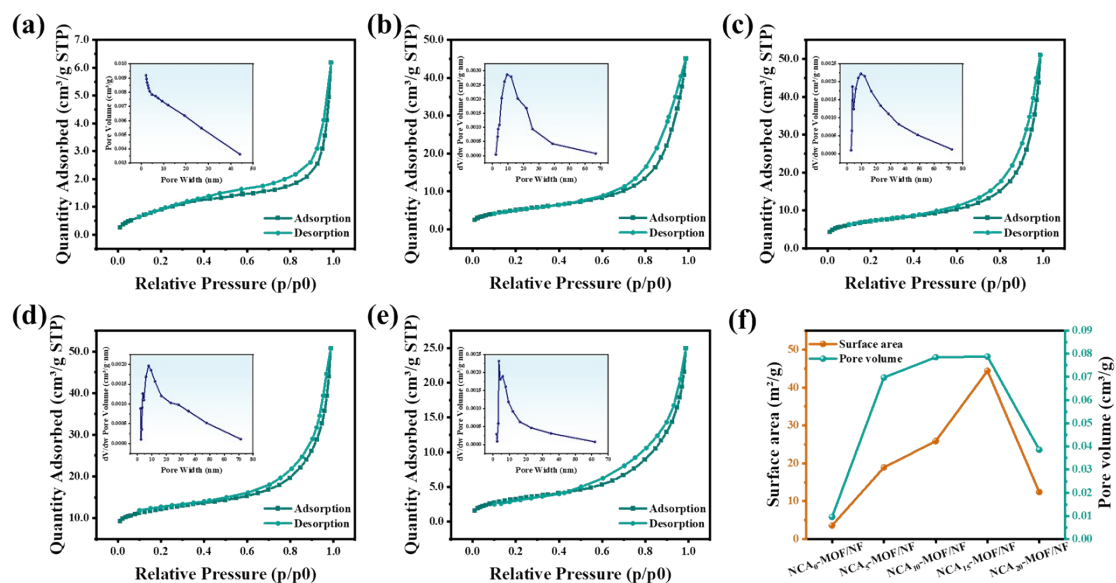

99

100 **Figure S3 (a-e)** N<sub>2</sub> adsorption-desorption isotherm with corresponding pore size distribution,

101 and **(f)** Specific surface area and pore volume of NCA<sub>x</sub>-MOF/NF electrodes.

102

103

104

105

106

107

108

109

110

111

112

113

114

115

116

117

118

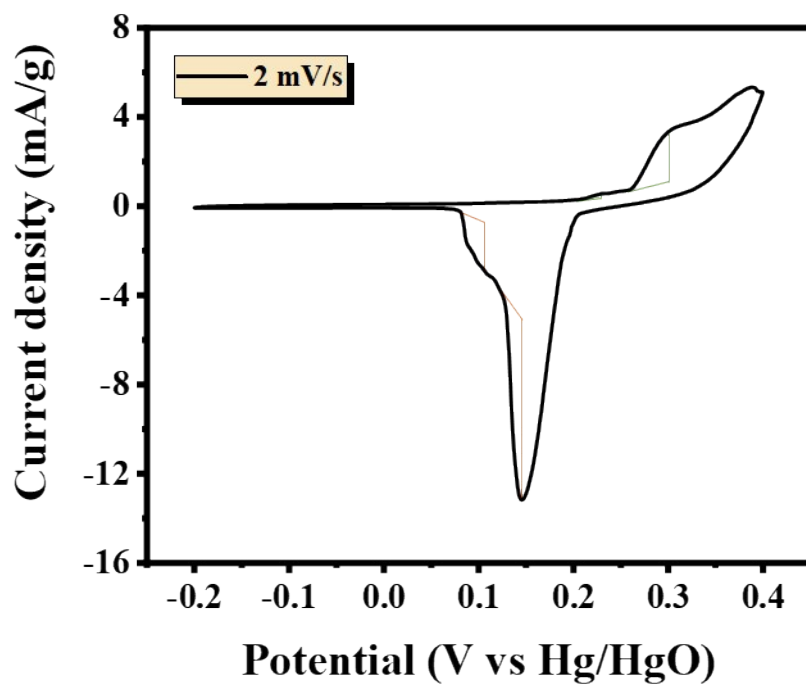

119

120 **Figure S4** CV curve of NCA<sub>15</sub>-MOF/NF at a scan rate of 2 mV/s, displaying low reversibility

121

with a broadened anodic peak.

122

123

124

125

126

127

128

129

130

131

132



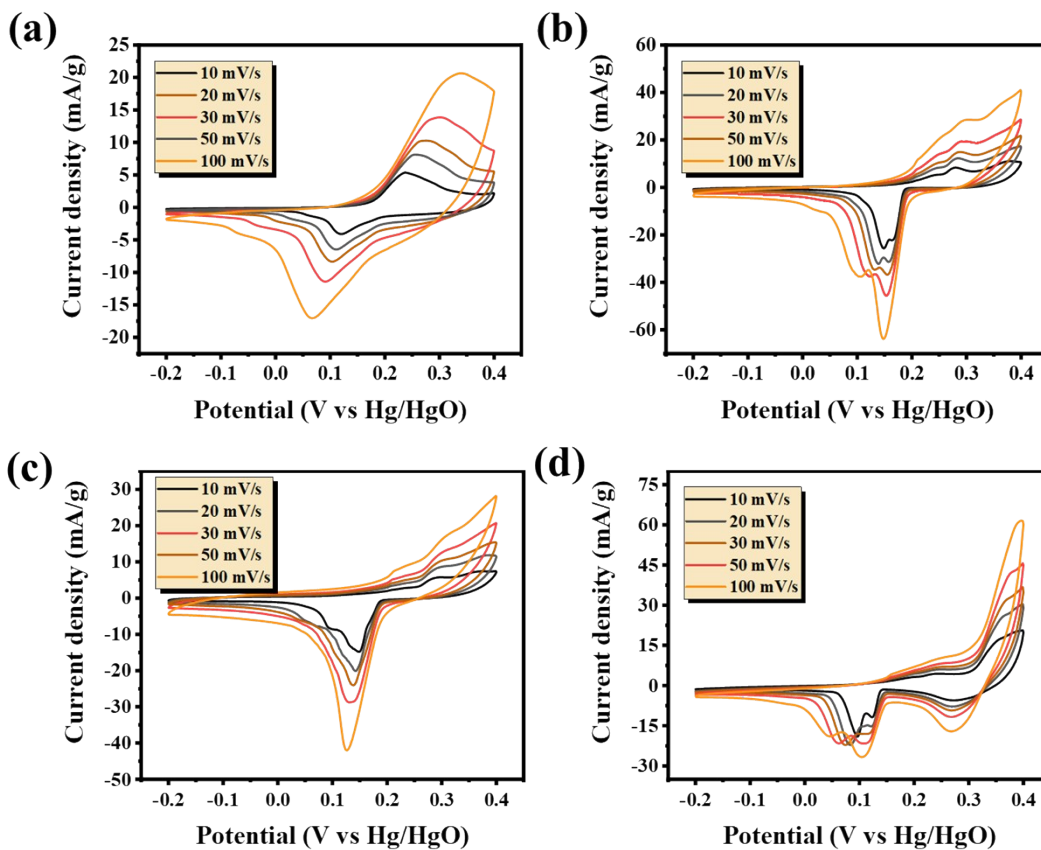

133

134 **Figure S5** The CVs of (a) NCA<sub>0</sub>-MOF/NF, (b) NCA<sub>5</sub>-MOF/NF, (c) NCA<sub>10</sub>-MOF/NF, (d)

135 NCA<sub>20</sub>-MOF/NF electrodes at different scan rates (from 10 mV/s to 100 mV/s) between -0.2

136 V to 0.4 V (vs. Hg/HgO).

137

138

139

140

141

142

143

144

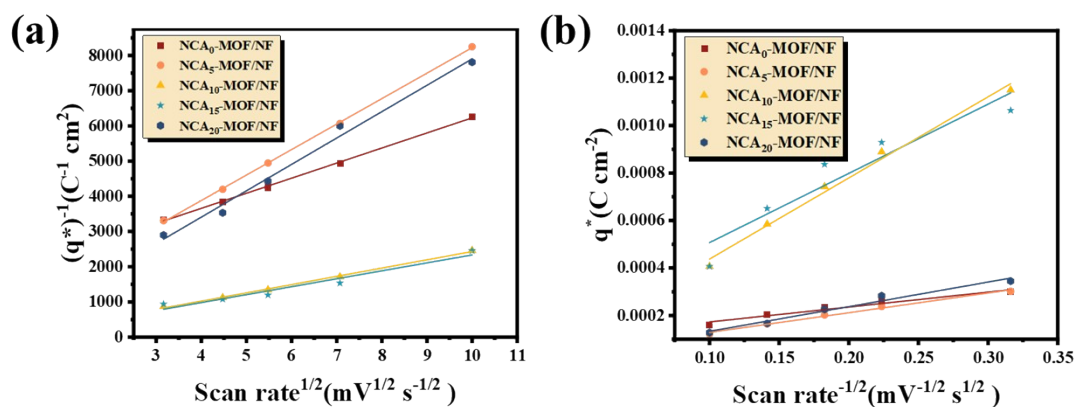

145

146 **Figure S6** Relationship between **(a)** Reciprocal voltammetric charge  $(q^*)^{-1}$  and the square

147 root of the scan rate ( $v^{1/2}$ ), and **(b)** Voltammetric charge  $(q^*)$  and the reciprocal square root of

148

the scan rate ( $v^{-1/2}$ ).

149

150

151

152

153

154

155

156

157

158

159

160

161

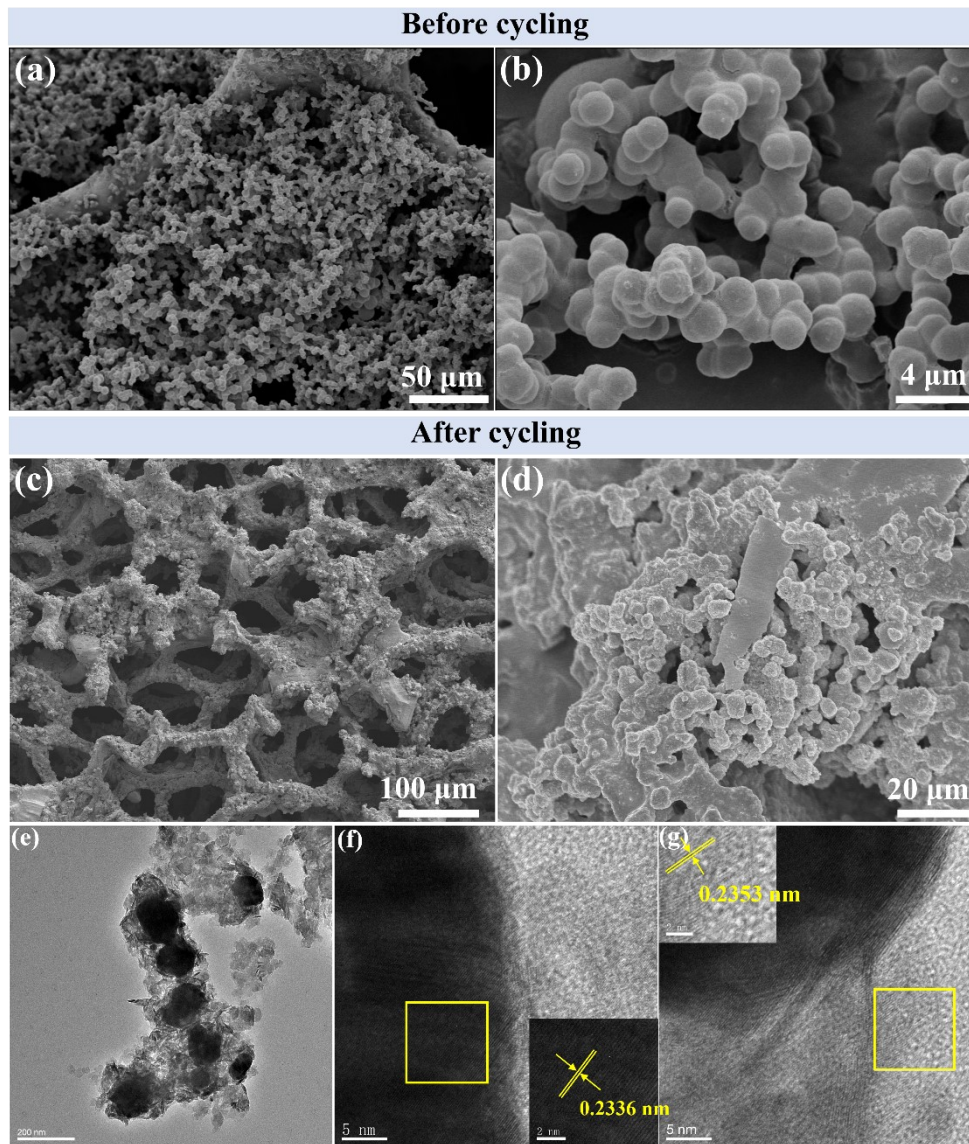

162

163 **Figure S7** SEM images of NCA<sub>15</sub>-MOF/NF: (a, b) before and (c, d) after cycling tests.

164 NCA<sub>15</sub>-MOF after cycling: (e) HRTEM image, (f) lattice spacing of Ag particles in NiCo-

165 LDH, and (g) lattice spacing of NiCo-LDH structure formed around Ag particles.

166

167

168

169

170

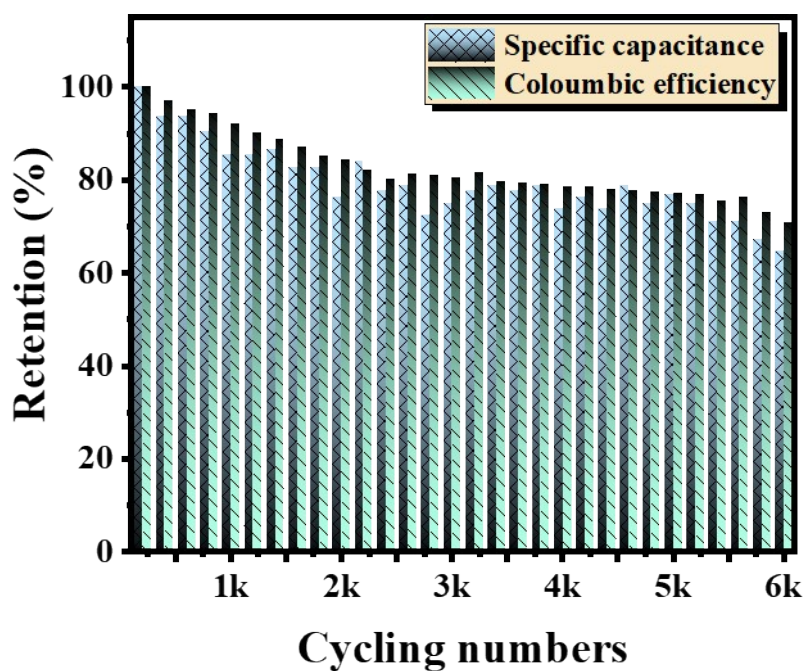

171

172 **Figure S8.** Cycling stability of the NCA<sub>0</sub>-MOF/NF electrode material at a current density of 5

173 A/g over 6,000 cycles. The specific capacitance retention and Coulombic efficiency decreased

174 to 64.68% and 70.8%, respectively.

175

176

177

178

179

180

181

182

183

184

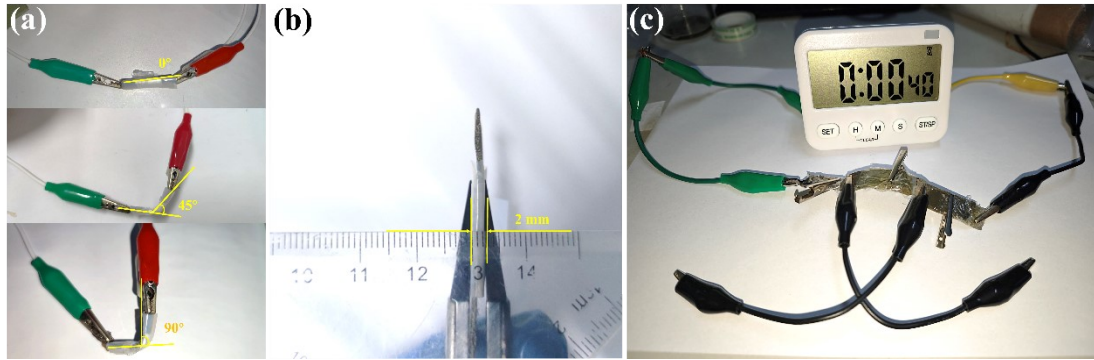

185

186 **Figure S9.** Photograph of the flexible SCs device: **(a)** Flexibility tests at angles 0°, 45°, and  
187 90°, **(b)** The thickness schematic of approximately 2 mm, and **(c)** A fully charged device can  
188 test the timer to work properly.

189

190

191

192

193

194

195

196

197

198

199

200

201

202

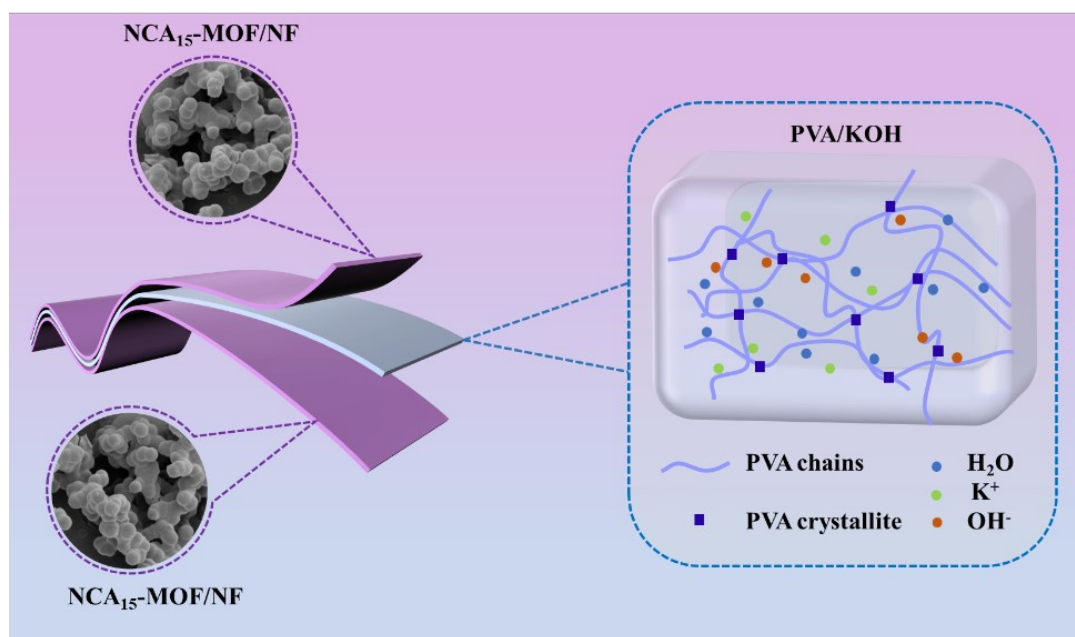

203

204 **Figure S10** Schematic representation of flexible quasi-solid symmetrical SCs.

205

206

207

208

209

210

211

212

213

214

215

216 **Table S1.** Ag concentration in various NCA<sub>x</sub>-MOF/NF samples analyzed by ICP-MS.

| <b>Materials</b>          | <b>Ag concentration (mg/g)</b> |
|---------------------------|--------------------------------|
| NCA <sub>5</sub> -MOF/NF  | 15.92                          |
| NCA <sub>10</sub> -MOF/NF | 26.26                          |
| NCA <sub>15</sub> -MOF/NF | 38.90                          |
| NCA <sub>20</sub> -MOF/NF | 64.36                          |

217

218

219

220

221

222

223

224

225

226

227

228

229

230

231

232

233

234

235

236

237

238 **Table S2** Voltammetric charges and electrochemical porosity of the electrodes.

| <b>Materials</b>          | <b><math>q_T</math> (mC cm<sup>-2</sup>)</b> | <b><math>q_O</math> (mC cm<sup>-2</sup>)</b> | <b><math>q_I</math> (mC cm<sup>-2</sup>)</b> | <b><math>q_I / q_T</math></b> |
|---------------------------|----------------------------------------------|----------------------------------------------|----------------------------------------------|-------------------------------|
| NCA <sub>0</sub> -MOF/NF  | 0.514                                        | 0.100                                        | 0.414                                        | 80.53%                        |
| NCA <sub>5</sub> -MOF/NF  | 1.014                                        | 0.456                                        | 0.557                                        | 54.97%                        |
| NCA <sub>10</sub> -MOF/NF | 11.411                                       | 0.959                                        | 10.451                                       | 91.59%                        |
| NCA <sub>15</sub> -MOF/NF | 12.710                                       | 0.215                                        | 12.494                                       | 98.31%                        |
| NCA <sub>20</sub> -MOF/NF | 2.414                                        | 0.030                                        | 2.384                                        | 98.77%                        |

239

240

241

242

243

244

245

246

247

248

249

250

251

252



253 **Table S3** Comparison of energy storage performance of MOF-based electrode materials in  
 254 symmetrical SCs devices with previously reported materials.

| Materials                                                  | Synthesis approach             | Specific capacitance | Device electrolyte                                  | Device performance after cycling       | Refs.      |
|------------------------------------------------------------|--------------------------------|----------------------|-----------------------------------------------------|----------------------------------------|------------|
| Zn-BTC MOF                                                 | Annealing                      | 285 F/g at 1 A/g     | 6.0 M KOH and 1.0 M Na <sub>2</sub> SO <sub>4</sub> | 89.4% after 10,000<br>80% after 10,000 | [2]        |
| NGCA(ZIF-8)                                                | Sol-gel process                | 125 F/g at 0.5 A/g   | 1.0 M Na <sub>2</sub> SO <sub>4</sub>               | 93% after 5,000                        | [3]        |
| Zn-In-S/C@CuO                                              | Solvothermal                   | 245 C/g at 2 A/g     | 3.0 M KOH                                           | 117% after 20,000                      | [4]        |
| Cu-MOF/rGO                                                 | Filtration and ultrasonication | 867.09 F/g at 1 A/g  | 1.0 M PVA/NaNO <sub>3</sub>                         | 90.07% after 10,000                    | [5]        |
| Zn-MOF-rGO                                                 | Hydrothermal                   | 82.5 F/g at 1 A/g    | 3.0 M KOH                                           | 87% after 5,000                        | [6]        |
| Zn-BTC@Ag <sub>5</sub> [BW <sub>12</sub> O <sub>40</sub> ] | Precipitation                  | 161.7 F/g at 1 A/g   | 1.0 M Na <sub>2</sub> SO <sub>4</sub>               | 91.4% after 5,000                      | [7]        |
| HHMCN(Zn-MOF-74)                                           | Solvothermal and sulfurization | 287 F/g at 0.5 A/g   | 2.0 M H <sub>2</sub> SO <sub>4</sub>                | 95.3% over 10,000                      | [8]        |
| NCA <sub>15</sub> -MOF/NF                                  | Hydrothermal                   | 1317 F/g at 1 A/g    | 3.0 M PVC/KOH                                       | 85.9% after 8,000                      | This study |

255

256

257

258

259

260

261

262

263

264

265

266

267

## 268 **References**

- 269 [1] Pahlevani L, Mozdianfard M R, Fallah N. Electrochemical oxidation treatment of offshore  
270 produced water using modified Ti/Sb-SnO<sub>2</sub> anode by graphene oxide. *Journal of Water*  
271 *Process Engineering*, 2020, 35: 101204.
- 272 [2] Liu N, Liu X, Pan J. A new rapid synthesis of hexagonal prism Zn-MOF as a precursor at  
273 room temperature for energy storage through pre-ionization strategy. *J Colloid Interface*  
274 *Sci*, 2022, 606: 1364-1373.
- 275 [3] Ping Y, Yang S, Han J, et al. N-self-doped graphitic carbon aerogels derived from metal-  
276 organic frameworks as supercapacitor electrode materials with high-performance.  
277 *Electrochimica Acta*, 2021, 380: 138237.
- 278 [4] Hussain I, Ansari M Z, Lamiel C, et al. In Situ Grown Heterostructure Based on MOF-  
279 Derived Carbon Containing n-Type Zn-In-S and Dry-Oxidative p-Type CuO as  
280 Pseudocapacitive Electrode Materials. *ACS Energy Letters*, 2023, 8(4): 1887-1895.
- 281 [5] Sarathkumar Krishnan A K G, Mayank K. Singh, Nikita Guha, Dharendra K. Rai. Nitrogen-  
282 rich Cu-MOF decorated on reduced graphene oxide nanosheets for hybrid supercapacitor  
283 applications with enhanced cycling stability. *Chemical Engineering Journal*, 2022,  
284 435:135042.
- 285 [6] Thi Q V, Patil S A, Katkar P K, et al. Electrochemical performance of zinc-based metal-  
286 organic framework with reduced graphene oxide nanocomposite electrodes for  
287 supercapacitors. *Synthetic Metals*, 2022, 290: 117155.
- 288 [7] Wang L, Kang N, Gong L, et al. A novel core-shell structured hybrid composed of zinc  
289 homobenzotriazole and silver borotungstate with supercapacitor and photocatalytic dye  
290 degradation performance. *Journal of Energy Storage*, 2022, 46: 103873.
- 291 [8] Li M, Zhang W, Liu T, et al. Hierarchical hollow microspheres of carbon nanorods with  
292 enhanced supercapacitor performance. *Materials Today Communications*, 2021, 28:  
293 102500.

294

295

296

297
